1 **Effects of confinement on body mass and site fidelity of feral pigeons during**  
2 **the setting-up of pigeon houses.**

3 Gasparini, Julien <sup>1</sup>, Dauphin Lise <sup>2</sup>, Favrelière, Justine<sup>1</sup>, Frantz Adrien <sup>1</sup>, Jacquin Lisa <sup>1,3</sup>,  
4 Récapet, Charlotte<sup>1,4,5</sup> & Prévot Anne-Caroline<sup>2</sup>.

5 <sup>1</sup> *Sorbonne Universités, UPMC Univ Paris 06, UPEC, Paris 7, CNRS, INRA, IRD, Institut*  
6 *d'Ecologie et des Sciences de l'Environnement de Paris, F-75005, Paris, France*

7 <sup>2</sup> *UMR 7204 Centre d'écologie et des sciences de la conservation CESCO, Muséum national*  
8 *d'histoire naturelle, CNRS, UPMC, CP 51, 55 rue Buffon, 75005 Paris, France*

9 <sup>3</sup> *Université Toulouse 3 Paul Sabatier, CNRS, ENFA, UMR 5174 EDB (Laboratoire Evolution*  
10 *& Diversité Biologique), F-31062 Toulouse, France*

11 <sup>4</sup> *Département d'Ecologie et d'Evolution, Biophore, Université de Lausanne, 1015 Lausanne-*  
12 *Dorigny, Switzerland*

13 <sup>5</sup> *LBBE, UMR 5558 CNRS-UCBL, Univ. Claude Bernard, Bât. Gregor Mendel, 43 boulevard*  
14 *du 11 novembre 1918, 69622 Villeurbanne, France*

15

16

17 **Corresponding author**

18 Julien Gasparini

19 Institut d'Ecologie et des Sciences de l'Environnement

20 Université Pierre et Marie Curie, CNRS, Bât. A, 7<sup>ème</sup> étage, case 237

21 7 quai Saint-Bernard 75252, Paris, FRANCE

22 Tel: +33 (1) 44 27 38 23

23 Fax: +33 (1) 44 27 35 16

24 Email: [julien.gasparini@upmc.fr](mailto:julien.gasparini@upmc.fr)

25

26 **Abstract**

27 Feral pigeons can reach high densities in the urban environments and have thus been subject  
28 to various regulation programs. Recently, an alternative ethical regulation strategy based on  
29 the installation of artificial breeding facilities has been tested in European cities. In Paris  
30 (France), pigeons are first confined for several weeks within the pigeon house before being  
31 released. According to authorities, this method allows to retain confined pigeons in this new  
32 habitat and to attract more conspecifics. This study aims at evaluating the efficiency and  
33 potential side-effects of this method by assessing pigeon fidelity behaviour and pigeon  
34 welfare after release. Results show that confinement in pigeon houses induced a significant  
35 body mass loss in birds. Only 19% of confined pigeons became faithful to their new habitat.  
36 This fidelity depended on the origin of birds suggesting that pigeons captured closer to the  
37 pigeon houses are more likely to stay in the vicinity of the pigeon house one year after.  
38 Investigations on methods of regulation on animal behavior may help to improve management  
39 procedures.

40

41 **Keywords** : Animal regulation, *Columba livia*, Ethical method, Feral pigeon, Urban nature

42

43 Urban animals have always coexisted with humans in cities, sometimes for historical reasons,  
44 depending on the predominant culture (Clark 2013). Until the beginning of the 20<sup>th</sup> century,  
45 domestic species were dominant in the urban landscape, such as pack animals (horses, cows),  
46 livestock (cows, goats, pigs, pigeons) or pets (cats, dogs) (Sabloff 2001). Nowadays, the only  
47 domestic species present in the cities are pets, but wild animal species are still present and  
48 managed in towns, in the positive vision of urban nature (Matsuoka and Kaplan 2008).

49 Feral pigeons *Columba livia* have an intermediary status, because they have domestic  
50 ancestors but are now thriving in cities independently of human care (Jerolmack 2008;  
51 Skandrani et al., 2014). They are present in cities worldwide, and their populations can reach  
52 high densities. Feral pigeons and their management procedures may cause social conflicts  
53 among citizens because different social groups of citizens often have very strong positioning  
54 for or against them (Jerolmack 2008; Colon and Lequarré 2013; Skandrani et al., 2014).  
55 Populations of urban pigeons have been subject to public regulation programs in many cities,  
56 including culling procedures (reviewed in Haag-Wackernagel 2002). In the last decades, an  
57 alternative regulation strategy based on the installation of artificial breeding facilities such as  
58 pigeon houses has been tested in European cities to limit local nuisances (e.g. Basel,  
59 Switzerland- Haag-Wackernagel 1995; Paris, France- Contassot 2007). Pigeon houses are  
60 artificial breeding places where eggs are removed or sterilized using various techniques to  
61 limit reproduction with variable consequences for pigeon reproduction and health (Jacquin et  
62 al., 2010; Gasparini et al., 2011). Pigeon houses are presented by local authorities as a mean  
63 to limit hatching rate and to maintain a small but healthy population (Contassot 2007). This  
64 regulation method is also promoted by associations for animal protection, as an ethical  
65 method that does not injure or kill individuals (Lizet and Milliet 2012). The management  
66 procedures carried out in pigeon houses are variable, but their relative efficiency and side-

67 effects are still unclear, so that few information is available for managers to choose regulation  
68 methods in pigeon houses.

69 In Paris (France), the setting-up of pigeon houses consists in a confinement of a part of  
70 the local population during three to four weeks and providing pigeons with food and water.  
71 According to authorities and pigeon house managers (Mairie de Paris, 2007; SREP,  
72 <http://www.srep.fr/>), this method is presented as allowing to retain confined pigeons in this  
73 new habitat and to attract more conspecifics. However, this confinement may have  
74 consequences for pigeons by increasing stress and impacting their health (Wingfield and  
75 Romero, 2001). This confinement method is thus perceived as harmful for captive pigeons  
76 and is rejected by protection associations. In this study, in agreement with Paris municipality,  
77 using an observational approach, we examined the effect of confinement on pigeon fidelity  
78 behaviour to the pigeon house and the change in body mass before and after the 3 or 4 weeks  
79 of confinements. Body mass loss is a good proxy indicating welfare of individuals (Hawkins  
80 2001; Jacquin et al. 2012). To our knowledge, this is the first scientific study testing the effect  
81 of this procedure on pigeon welfare and behaviours.

82

### 83 **Material and methods**

84 The regular implementation of public pigeon houses in Paris belongs to the official program  
85 of the current Paris authorities (Mairie de Paris 2007). These public structures are managed by  
86 a private company, the Society for Regulation in Pigeon Houses (SREP) which is in charge of  
87 attracting pigeons in the structure, of feeding them and controlling reproduction regularly. In  
88 agreement with Paris municipality, we performed the study in 2010 and 2011, when three new  
89 pigeon houses were implemented: Saint-Eloi (District 12), Saint-Cloud (District 16) and Javel  
90 (District 15) in Paris. 32 pigeons were captured at Saint-Eloi, 47 pigeons at Saint-Cloud on  
91 the 17<sup>th</sup> March 2010 and 29 pigeons were captured at Javel on the 13<sup>th</sup> April 2011 using bait

92 cages with corn. The pigeons in Saint-Eloi and Javel were captured in the vicinity of pigeon  
93 houses (in a radius of 50 meters around) while pigeons in Saint-Cloud were captured two  
94 kilometers away from the pigeon house with the same baiting cages. After the capture, birds  
95 were individually marked with a combination of three color rings that allowed us to identify  
96 them from a distance. Pigeons were also weighed to the nearest 5 g with a spring balance  
97 (Medio-Line 40600; Pesola, Baar, Switzerland) and an age class was visually determined  
98 (juveniles vs. adults) based on the eye color and on the feather shape (Johnson & Janiga  
99 1995). The light sexual dimorphism in pigeons did not enable us to visually sex them, we  
100 assumed that sex-ratio did not differ between pigeon houses. In total, 108 pigeons were  
101 captured and confined including 10 juveniles and 98 adults. The number of juveniles was  
102 significantly more important (Fisher exact test,  $P = 0.001$ ) in Saint-Eloi (8 over 32) than in  
103 Javel (2 over 47) and Saint-Cloud (0 over 29). Pigeons were then confined in the pigeon  
104 houses until the 6<sup>th</sup> April 2010 for Saint-Eloi (i.e., 21 days), until 15<sup>th</sup> April 2010 for Saint-  
105 Cloud (i.e., 30 days) and until 12<sup>th</sup> May 2011 for Javel (i.e., 29 days). This protocol was  
106 constrained by the SREP company. During the confinement, food was supposed to have been  
107 provided *ad libitum* by the SREP, with a mix of corn, wheat, and peas supplemented with  
108 minerals. Pigeons were weighed again at the end of confinement before being released. For  
109 commercial reasons, we were not authorized to follow the protocol performed by the SREP  
110 during the confinement period. So we were not able to know whether food and water was  
111 effectively provided *ad libitum*. The year following the confinement (between January and  
112 March 2011 and 2012, respectively, for Saint-Eloi and Saint-Cloud and for Javel), we looked  
113 for marked pigeons once every two weeks during two months (5 sessions of monitoring)  
114 around the pigeon houses to monitor their fidelity behaviour. Each of the 5 monitoring session  
115 lasted 30 minutes and was performed by two of us (LD and CR). We consider an individual  
116 faithful to the pigeon house when it was seen, at least one time during the 5 sessions, within a

117 radius of 20 meters around the pigeon house one year later. It includes birds seen either on the  
118 top, on the feet or in front of the exit of the pigeon house. This fidelity, therefore, includes  
119 birds that used pigeon house either to eat, to nest or living in its close proximity. This study  
120 was carried out in strict accordance with the recommendations of the European Convention  
121 for the Protection of Vertebrate Animals used for Experimental and Other Scientific Purposes  
122 (revised Appendix A) and with the Guide for the Care and Use of Laboratory Animals. All  
123 experiments and captures were approved by local authorities and the “Direction  
124 Départementale des Services Vétérinaires de Seine-et-Marne” (permit No. 77-05).

125

126 All statistical analyses were then performed on the data using SAS (version 9.4).

127

## 128 **Results**

129 In all three pigeon houses, the number of released pigeons was lower than the number  
130 of confined pigeons (Table 1). Most of them were missing and three of them were found dead  
131 in the pigeon house at Saint-Eloi. According to the SREP, missing birds escaped during the  
132 feeding.

133 During the confinement, pigeons lost a significant amount of body mass in the three  
134 different pigeon houses (paired student t-test; Saint-Cloud: 7% of body mass loss,  $t_{35} = 4.53$ ,  $P$   
135  $\leq 0.0001$ ; Saint-Eloi: 19% of body mass loss,  $t_{20} = 10.14$ ,  $P \leq 0.0001$ ; Javel: 9% of body mass  
136 loss,  $t_{17} = 4.64$ ,  $P = 0.0002$ ; Figure 1). The mass loss differed significantly among pigeon  
137 houses (ANOVA,  $F_{2,72} = 11.36$ ,  $P \leq 0.0001$ , Figure 1). Potts-hoc tests revealed that the loss  
138 was significantly more important in Saint-Eloi than in Saint-Cloud (Tukey-Kramer,  
139  $P \leq 0.0001$ ) and in Javel ( $P = 0.0025$ ). The mass lost did not differ between Saint-Cloud and  
140 Javel ( $P = 0.85$ ). We compared this body mass loss with body mass changes observed for 112  
141 pigeons captured in the urban environment and placed in captivity in outdoor aviaries in

142 similar food conditions in 2009 (*ad libitum* mix of corn, wheat, and peas supplemented with  
143 minerals; Jacquin et al., 2012). Results show that pigeons fed *ad libitum* in captivity gained a  
144 significant amount of body mass (15% gain on average) over 30 days (t-test:  $t_{111} = 7.57$ ,  $P$   
145  $\leq 0.0001$ ).

146 One year after the confinement, 19.4 % of pigeons were seen alive and present close to  
147 the pigeon houses where they have been confined (Table 1). Ten of these 21 pigeons were  
148 seen only once over the 5 sessions, 5 were seen two times, 1 was seen three times and 5 were  
149 seen four times. This distribution did not vary significantly among pigeon houses (Fisher  
150 exact test  $P = 0.16$ ). However, the proportions of pigeons seen at least one times one year  
151 after the confinement significantly differed among pigeon houses (Logistic regression,  $\chi^2_2 =$   
152  $6.05$ ,  $P = 0.048$ , Table 1) but not between ages of pigeon (Logistic regression,  $\chi^2_2 = 0.29$ ,  $P =$   
153  $0.59$ ). Pots-hoc tests revealed that this proportion was significantly lower in Saint-Cloud than  
154 in Saint-Eloi ( $\chi^2_1 = 5.52$ ,  $P = 0.01$ ) and in Javel ( $\chi^2_1 = 5.07$ ,  $P = 0.02$ ). These proportion did not  
155 differ between Saint-Eloi and Javel ( $\chi^2_1 = 0.00$ ,  $P = 0.96$ ). Among the 21 pigeons seen alive  
156 one year after the confinement, 18 were adults and 3 juveniles. All re-observed juveniles were  
157 from the Saint-Eloi pigeon house. The re-observation rate of juveniles (30.0 %) did not differ  
158 from the adult one (18.4 %; Fisher exact test  $P = 0.40$ ).

159

## 160 **Discussion**

161 This study showed consistent results in three different pigeon houses. In all of them, the  
162 confinement of birds within the pigeon houses for 3 weeks strongly reduced their body mass  
163 (Figure 1), which could have detrimental effects on their health status (Møller 1998). This  
164 loss of body mass could have been caused by captivity. However, another subset of pigeons  
165 caught in Paris and put in captivity in open aviary and fed *ad libitum* had a significant  
166 increase in their body mass. Several alternative causes can be proposed to explain this strong

167 decrease in body mass after confinement. First, body mass loss may have just resulted from a  
168 natural and biological variation in this species (Sargisson et al. 2007). Indeed, there are  
169 several examples of seasonal body mass loss such as during the migration, during the  
170 incubation or during the chick rearing period (Bryant 1988; Schwilch et al., 2002). However,  
171 pigeons are non-migrating birds and no reproduction event occurred during the confinement  
172 in our study. Our results are thus not consistent with a natural variation of body mass. Another  
173 potential cause of this body mass reduction is the stress caused by confinement conditions.  
174 This stress could have been caused by capture and manipulations of the birds before the  
175 confinement. Indeed, birds were weighed and marked in the three pigeon houses; moreover,  
176 in Saint-Eloi and Saint-Cloud, we took a blood sample for epidemiological analyses  
177 (Gasparini et al., 2011), and this manipulation could have been stressful for pigeons and  
178 caused the observed decrease of body mass. This interpretation is however unlikely for two  
179 reasons: first, a body mass loss was also observed in pigeons in Javel for which no blood  
180 sample were taken. Secondly, in another subset of pigeons (Jacquin et al., 2012), captured and  
181 manipulated in the urban environment in the same manner, and then put in captivity  
182 individually in aviaries with *ad libitum food*, increased their body mass after 30 days (see also  
183 Poling et al., 1990).

184         The last interpretation is that confinement *per se* might dramatically increase the stress  
185 for pigeons resulting in a significant decrease in body mass. First, living in a dense group with  
186 a unique source of food and increased proximity between individuals could be a factor of  
187 elevated stress, as shown in mice (Bartolomucci et al., 2004). Pigeon is known to be a social  
188 species with a strong hierarchical structure (Johnston and Janiga, 1995; Sol et al., 1998). The  
189 fact that food was provided in a unique localization may increase competition within the  
190 pigeon house and may increase aggressive interactions among individuals. Second, the  
191 confinement may induce a psychological stress responsible of body mass loss (Morgan and



192 Tromborg, 2007). As we were not able to check that food was providing *ad libitum* during the  
193 confinement, we also cannot fully exclude that food was not lacking during this period.  
194 Finding the mechanisms responsible of this body mass loss would allow us to find alternative  
195 methods to avoid negative side-effects of pigeon houses on pigeon condition.

196         A second interesting result of our study is the estimation of fidelity of confined birds.  
197 The confinement enabled for approximately 19% of birds to become faithful to this new  
198 habitat. This low fidelity is however difficult to interpret for several reasons. First, when a  
199 bird is not re-observed one year after, it might be dead or have migrated to another site.  
200 Therefore, with our method, we cannot distinguish between mortality and fidelity. In any  
201 cases, the objective of the pigeon houses is to fix alive individuals in these latter and,  
202 according to our results, this objective is only few filled (only for 19% birds) either because  
203 the confinement induced high mortality or did not enable to make birds loyal enough to the  
204 pigeon house. Alternatively, the low site fidelity observed in our study might be caused by the  
205 egg removing that reduce reproductive success. Indeed, previous studies on habitat selection  
206 predict that reproductive success may directly impact whether individuals are coming back to  
207 the same site of reproduction or are leaving to another one (Switzer 1993). Future studies  
208 should therefore investigate how egg removal may alter the site fidelity. Interestingly, the re-  
209 observation rate in the pigeon houses of Saint-Eloi and Javel were higher (around 30 %) than  
210 the re-observation in the Saint-Cloud pigeon house (8.5 %, Table 1). Contrary to Saint-Eloi  
211 and Javel, the pigeons confined in Saint-Cloud were not captured on the site of the pigeon  
212 house, but 2 km away from it. Although further studies need to be carried out to confirm our  
213 results, this suggests that pigeons should be captured very close to the site of the pigeon house  
214 to ensure a long-term fidelity to the pigeon house. Indeed, several studies outlined the limited  
215 home range of pigeons in the urban environment (mostly below 1.5 km of radius; Sol and  
216 Senar 1995; Rose et al., 2006; Frantz et al., 2012), so that capturing pigeons close to the

217 pigeon house could prevent their return to their previous home range and increase the chance  
218 of the setting-up of a permanent and healthy pigeon colony within the pigeon house.  
219 Alternatively, the higher re-observation rate in Saint-Eloi could be due to the higher  
220 frequency of juveniles confined in this pigeon house. However, this effect was not significant  
221 and, therefore, this interpretation is unlikely.

222

## 223 **Conclusion**

224 In conclusion, our study is the first to evaluate the method of setting-up of pigeon  
225 houses for regularization purposes. Our results showed that the confinement before the  
226 opening of the pigeon house has dramatic consequences for birds in terms of body mass loss  
227 with potential negative consequences for their health status and survival, although the  
228 underlying mechanism remains to be identified. Results also suggest that the fidelity of  
229 confined birds to the pigeon house after one year depends on the origin of birds and might be  
230 improved by local captures around the pigeon house.

231 The implementation of pigeon houses to manage pigeon populations is fully  
232 acceptable for pigeons' protection associations (Lizet and Milliet, 2012), contrary to other  
233 public measures such as feeding ban (Colon and Lequarré, 2013). If adequately managed,  
234 pigeon houses could therefore serve as mediators between conflicting social groups of the  
235 "pigeon problem" (see actor-network theory, Latour 2005). However, to let them play such a  
236 role, a high level of quality and transparency in all management decisions is needed, in order  
237 to encourage communication and participation in management decision-making. We therefore  
238 encourage the communication of the scientific data provided by this study to all managers and  
239 stakeholders, to help designing and improving co-management procedures of pigeon  
240 populations and ensure a peaceful cohabitation of nature and citizens within the urban habitat.

241

242 **Acknowledgements**

243 We thank Paris municipality to have allowed us to survey pigeons in the three studied pigeon  
244 houses. We are very grateful to Gérard Leboucher, H el ene Corbel and Philippe Lenouvel for  
245 the help they provided at different stages of the study. This work was financed by grants from  
246 the local government (Ile-de-France: Sustainable Development Network R2DS, No. 2008-07).  
247 L. Jacquin was supported by a Ph.D. fellowship from the French Ministry of Research. L.  
248 Dauphin was supported by the ATM “Relations hommes-nature sur le long terme”, from the  
249 national museum of natural history.

250

251 **References**

- 252 Bartolomucci, A., Pederzani, T., Sacerdote, P., Panerai, A.E., Parmigiani, S. and Palanza, P.  
253 (2004) Behavioral and physiological characterization of male mice under chronic  
254 psychosocial stress. *Psychoneuroendocrino.*, **29**, 899-910.
- 255 Bryant, D.M. (1988) Energy expenditure and body mass changes as measures of reproductive  
256 costs in birds. *Funct. Ecol.*, **2**, 23-34.
- 257 Clark, P. (2013) *Handbook of cities in world history*. Oxford University Press, Oxford.
- 258 Colon, P.L. and Lequarr e, N. (2013) Le nourrissage des pigeons dans la r egion parisienne.  
259 *Ethnologie fran aise*, **XLIII**, 153-160. [In French.]
- 260 Contassot, Y. (2007) La politique de la ville : pour une gestion durable des pigeons   Paris,  
261 in : Mairie de Paris (Ed.), Bien vivre avec les animaux   Paris, le guide de l’animal en  
262 ville. Mairie de Paris, Paris, pp. 11. [In French.]
- 263 Frantz, A., Pottier, M.A., Karimi, B., Corbel, H., Aubry, E., Haussy, C., Gasparini, J. and  
264 Castrec-Rouelle, M. (2012) Contrasting levels of heavy metals in the feathers of urban  
265 pigeons from close habitats suggest limited movements at a restricted scale. *Environ.*  
266 *Pollut.*, **168**, 23-28.

- 267 Gasparini, J., Erin, N., Bertin, C., Jacquin, L., Vorimore, F., Frantz, A., Lenouvel, P. and  
268 Laroucau, K. (2011) Impact of urban environment and host phenotype on the  
269 epidemiology of Chlamydiaceae in feral pigeons. *Environ. Microbiol.*, **13**, 3186-3193.
- 270 Haag-Wackernagel, D. (1995) Regulation of the street pigeon in Basel. *Wildlife Society*  
271 *Bulletin*, **23**, 256-260.
- 272 Haag-Wackernagel D (2002) Feral Pigeons: Management Experiences in Europe. In: Dinetti,  
273 M. Ed., Atti 2° Convegno Nazionale sulla Fauna Urbana, *Specie ornamentiche*  
274 *problematiche: Biologia e gestione nelle città e nel territorio*. pp. 25-37, 10 Giugno  
275 2000, ARSIA e LIPU., Firenze (Toscana).
- 276 Hawkins, P. (2001) Laboratory birds, refinements in husbandry and procedures. Fifth report  
277 of the BVAAWF/FRAME/RSPCA/UFAW Joint Working Group on Refinement. *Lab.*  
278 *Anim.*, **35**,1-163.
- 279 Jacquin, L., Cazelles, B., Prévot-Julliard, A-C., Leboucher, G. and Gasparini, J. (2010)  
280 Reproduction management in pigeon houses affects breeding ecology of feral pigeons:  
281 implications for control policies. *Can. J. Zool.*, **88**, 781-787.
- 282 Jacquin, L., Recapet, C., Bouche, P., Leboucher, G. and Gasparini, J. (2012) Melanin-based  
283 coloration reflects alternative strategies to cope with food limitation in pigeons. *Behav.*  
284 *Ecol.*, **23**, 907-915.
- 285 Jacquin, L., Blottiere, L., Haussy, C., Perret, S. and Gasparini, J. (2012) Prenatal and postnatal  
286 parental effects on immunity and growth in 'lactating' pigeons. *Funct. Ecol.*, **26**, 866-  
287 875.
- 288 Jerolmack, C. (2008) How pigeons became rats: the cultural-spatial logic of problem animals.  
289 *Social Problems*, **55**, 72-94.
- 290 Johnston, R.F. and Janiga, M. (1995) *Feral pigeons*. Oxford University Press, Oxford.

- 291 Latour, B. (2005) *Reassembling the Social: An Introduction to Actor-Network-Theory*. Oxford  
292 University Press, Oxford.
- 293 Lizet, B. and Milliet, J. (2012) Le pigeonnier public, à la croisée des utopies sur le vivant dans  
294 la ville. In : Lizet, B. and Milliet J. eds, « *Animal certifié conforme. Déchiffrer nos*  
295 *relations avec le vivant* », pp. 185-204. Dunod, Paris. [In French.]
- 296 Mairie de Paris. 2007. Bien vivre avec les animaux à Paris, protégeons notre environnement.  
297 Dossier Environnement. [http://www.paris.fr/publications/publications-de-la-](http://www.paris.fr/publications/publications-de-la-ville/guides-et-brochures/bien-vivre-avec-les-animaux-a-paris/rub_6403_stand_15553_port_14438)  
298 [ville/guides-et-brochures/bien-vivre-avec-les-animaux-a-](http://www.paris.fr/publications/publications-de-la-ville/guides-et-brochures/bien-vivre-avec-les-animaux-a-paris/rub_6403_stand_15553_port_14438)  
299 [paris/rub\\_6403\\_stand\\_15553\\_port\\_14438](http://www.paris.fr/publications/publications-de-la-ville/guides-et-brochures/bien-vivre-avec-les-animaux-a-paris/rub_6403_stand_15553_port_14438). [In French.] [accessed 16 January 2016].
- 300 Matsuoka, R.H. and Kaplan, R. (2008) People needs in the urban landscape: analysis of  
301 Landscape and Urban Planning contributions. *Landscape Urban Planning*, **84**, 7-19.
- 302 Møller, A.P., Christe, P., Erritzøe, J. and Mavarez, J. (1998) Condition, disease and immune  
303 defence. *Oikos*, **83**, 301-306.
- 304 Morgan, K.N. and Tromborg, C.T. (2007) Sources of stress in captivity. *Appl. Anim. Behav.*  
305 *Sci.*, **102**, 262-302.
- 306 Poling, A., Nickel, M. and Alling, K. (1990) Free birds aren't fat: weight gain in captured wild  
307 pigeons maintained under laboratory conditions. *J. Exp. Anal. Behav.*, **53**, 423-424.
- 308 Rose, E., Nagel, P. and Haag-Wackernagel, D. (2006) Spatio-temporal use of the urban  
309 habitat by feral pigeons (*Columba livia*). *Behav. Ecol. Sociobiol.*, **60**, 242-254.
- 310 Sabloff, A. (2001) *Reordering the natural world. Humans and animals in the city*. University  
311 of Toronto Press, Toronto, Canada.
- 312 Schwilch, R., Grattarola, A., Spina, F. and Jenni, L. (2002) Protein loss during long distance  
313 migratory flights in passerine birds: adaptation and constraint. *J. Exp. Biol.*, **205**, 687-  
314 695.

- 315 Sargisson, R.J., McLean, I.G., Brown, G.S. and White, K.G (2007) Seasonal variation in  
316 pigeon body weight and delayed matching-to-sample performance. *J. Exp. Anal. Behav.*,  
317 **88**: 395-404.
- 318 Skandrani, Z., Lepetz, S. and Prévot-Julliard, A-C. (2014) Nuisance species: beyond the  
319 ecological perspective. *Ecological Processes*, **3**, 3.
- 320 Sol, D., Santos, D.M., Garcia, J. and Cuadrado, M. (1998) Competition for food in urban  
321 pigeons: the cost of being juvenile. *Condor*, **100**, 298-304.
- 322 Sol, D. and Senar, J.C. (1995) Urban pigeon populations: stability, home range, and the effect  
323 of removing individuals. *Can. J. Zool.*, **73**, 1154-1160.
- 324 Switzer, P. V. (1993) Site fidelity in predictable and unpredictable habitats. *Evol. Ecol.*, **7**,  
325 533-555.
- 326 Wingfield, J.C. and, Romero, L.M. (2001) Adrenocortical responses to stress and their  
327 modulation in free-living vertebrates. In: McEwen, B.S. ed. *Handbook of physiology*.  
328 pp. 211-234, Oxford University Press, New York.
- 329

330 **Figure 1** : Average body mass  $\pm$  se of pigeons at time of confinement (black) and at time of  
331 releasing (grey) of the three pigeon houses.

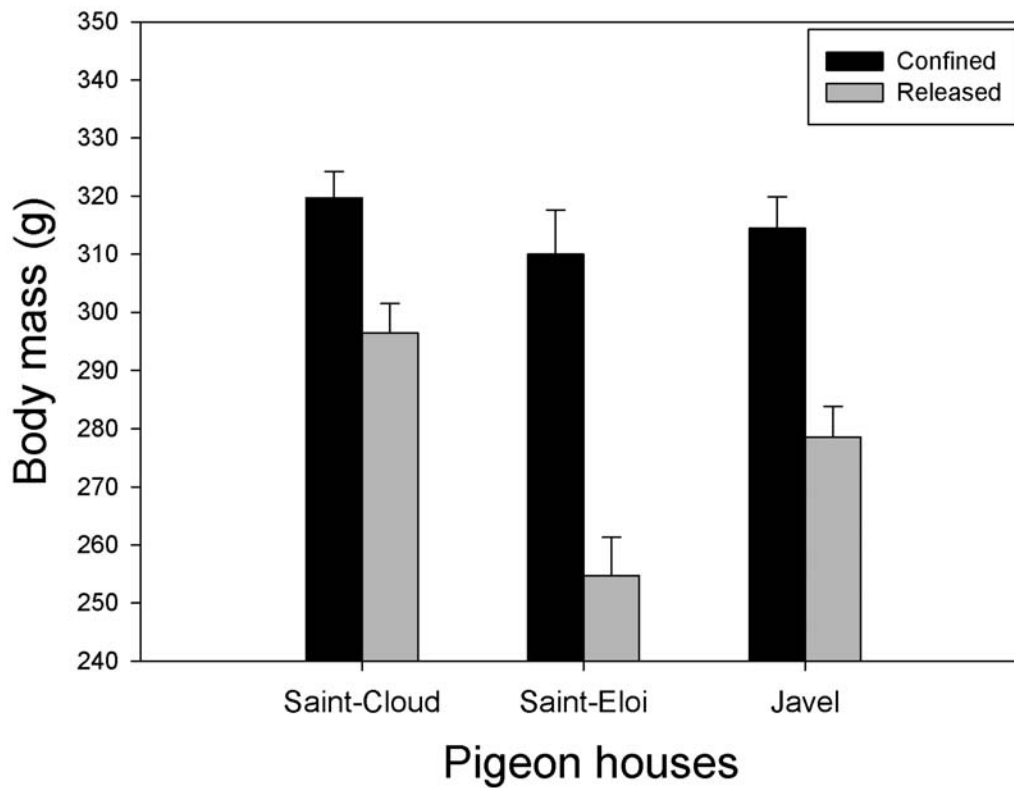

332

333

|                                                                      | <b>Total</b> | <b>Saint-Cloud</b> | <b>Saint-Eloi</b> | <b>Javel</b> |
|----------------------------------------------------------------------|--------------|--------------------|-------------------|--------------|
| <b>Confined</b>                                                      | 108 (100%)   | 47 (100%)          | 32 (100%)         | 29 (100%)    |
| <b>Released</b>                                                      | 75 (69.4%)   | 36 (76.6%)         | 21 (65.6%)        | 18 (62.1%)   |
| <b>Seen alive one<br/>year later<br/>around the<br/>pigeon house</b> | 21 (19.4%)   | 4 (8.5%)           | 9 (34.4%)         | 8 (27.6%)    |

334

335 **Table 1:** Numbers and percentages of individuals confined in pigeon houses, released 3

336 weeks later and seen the following year in pigeon houses.
